# Supplementary material for: Major infections in newly diagnosed systemic lupus erythematosus: an inception cohort study
Source: PubMed Central journal article supplement — Lupus Sci Med. 2022 Aug 30;9(1):e000725. doi: 10.1136/lupus-2022-000725 (PMC9438011; doi:10.1136/lupus-2022-000725), 2022-08-30
Supplement: lupus-2022-000725supp001.pdf [file lupus-2022-000725supp001.pdf]

Supplementary Table 1. Multivariable logistic regression model for 1-year all-cause death

| Variables                              | P value           | OR            | 95% CI              |
|----------------------------------------|-------------------|---------------|---------------------|
| Age                                    | <0.0001           | 1.058         | 1.026-1.092         |
| SLEDAI > 10                            | 0.639             | 1.323         | 0.411-4.262         |
| Pulmonary hypertension                 | 0.182             | 2.350         | 0.671-8.230         |
| Platelet count <100X10 <sup>9</sup> /L | 0.146             | 2.040         | 0.779-5.340         |
| Serum creatinine > 104 µmol/L          | 0.059             | 2.693         | 0.962-7.536         |
| <b>Infection</b>                       | <b>&lt;0.0001</b> | <b>22.083</b> | <b>6.752-72.228</b> |

SLEDAI: Systemic Lupus Erythematosus Disease Activity Index.

Supplementary Table 2. Sites of infection and isolated microorganisms

| Site                        | Number    | Organism                                                                                                                                                                                                                                                                                                                                                                                                                                                                                                                                                                                                                                                                  |
|-----------------------------|-----------|---------------------------------------------------------------------------------------------------------------------------------------------------------------------------------------------------------------------------------------------------------------------------------------------------------------------------------------------------------------------------------------------------------------------------------------------------------------------------------------------------------------------------------------------------------------------------------------------------------------------------------------------------------------------------|
| <b>Definitive diagnosis</b> |           |                                                                                                                                                                                                                                                                                                                                                                                                                                                                                                                                                                                                                                                                           |
| <b>Pulmonary</b>            | <b>12</b> | <u>Organism isolated from BALF</u> : <i>Pneumocystis jirovecii</i> (3), <i>Aspergillus</i> (1), <i>Candida albicans</i> (1), <i>Nocardia</i> (1), <i>Staphylococcus</i> (1), <i>Enterococcus</i> + <i>Aspergillus</i> (1), <i>Staphylococcus</i> + <i>Candida albicans</i> (1), <i>Staphylococcus</i> + <i>Aspergillus</i> (1), <i>Streptococcus</i> + <i>Neisseria sicca</i> + <i>Aspergillus</i> (1), <i>Psuedomonas aeruginosa</i> + <i>Acinetobacter baumannii</i> + <i>Klebsiella pneumoniae</i> + <i>Enterobacter sp.</i> (1),                                                                                                                                      |
| <b>Bacteraemia</b>          | <b>6</b>  | <i>Streptococcus</i> (2), <i>Staphylococcus</i> (1), <i>Enterococcus</i> (1), <i>Psuedomonas aeruginosa</i> + <i>Nocardia</i> (1), <i>Staphylococcus</i> + <i>Klebsiella pneumoniae</i> (1)                                                                                                                                                                                                                                                                                                                                                                                                                                                                               |
| <b>Skin and soft-tissue</b> | <b>7</b>  | <i>Herpes zoster</i> (7)                                                                                                                                                                                                                                                                                                                                                                                                                                                                                                                                                                                                                                                  |
| <b>Serous cavity</b>        | <b>4</b>  | <i>Mycobacterium tuberculosis</i> (2), <i>Nocardia</i> (1), <i>Klebsiella pneumoniae</i> (1)                                                                                                                                                                                                                                                                                                                                                                                                                                                                                                                                                                              |
| <b>Systemic (viral)</b>     | <b>2</b>  | <i>Cytomegalovirus</i> (1), <i>Cytomegalovirus</i> + <i>Epstein-Barr virus</i> (1)                                                                                                                                                                                                                                                                                                                                                                                                                                                                                                                                                                                        |
| <b>Multiple infection</b>   |           |                                                                                                                                                                                                                                                                                                                                                                                                                                                                                                                                                                                                                                                                           |
| Bacteraemia+ Pulmonary      | 9         | <i>Klebsiella pneumoniae</i> + <i>Enterococcus</i> + <i>Candida albicans</i> (BALF) (1), <i>Listeria monocytogenes</i> + <i>Candida glabrata</i> (sputum) (1), <i>Micrococcus luteus</i> + <i>Aspergillus</i> (sputum) (1), <i>Staphylococcus</i> + <i>Aspergillus</i> (BALF) (1), <i>Staphylococcus</i> + <i>Aspergillus</i> (sputum) (1), <i>Staphylococcus</i> + <i>Haemophilus influenzae</i> (BALF)+ <i>Candida albicans</i> (BALF) (1), <i>Staphylococcus</i> + <i>Aspergillus</i> (sputum)+ <i>Enterococcus faecium</i> (sputum) (1), <i>Staphylococcus</i> + <i>Psuedomonas aeruginosa</i> (sputum) (1), <i>Streptococcus</i> + <i>Streptococcus</i> (sputum) (1) |
| Bacteraemia+CNS             | 2         | <i>Salmonella</i> + <i>Salmonella</i> (1), <i>Psuedomonas aeruginosa</i> + <i>Psuedomonas aeruginosa</i> (1)                                                                                                                                                                                                                                                                                                                                                                                                                                                                                                                                                              |
| Bacteraemia+Urinary         | 1         | <i>Staphylococcus</i> + <i>Staphylococcus</i> (1)                                                                                                                                                                                                                                                                                                                                                                                                                                                                                                                                                                                                                         |
| Pulmonary+ Systemic (viral) | 1         | Unidentified + <i>Cytomegalovirus</i> (1)                                                                                                                                                                                                                                                                                                                                                                                                                                                                                                                                                                                                                                 |
| <b>Clinical diagnosis</b>   |           |                                                                                                                                                                                                                                                                                                                                                                                                                                                                                                                                                                                                                                                                           |
| <b>Pulmonary</b>            | <b>9</b>  | Unidentified                                                                                                                                                                                                                                                                                                                                                                                                                                                                                                                                                                                                                                                              |
|                             | <b>15</b> | <u>Organism isolated from sputum</u> : <i>Aspergillus</i> (4), <i>Acinetobacter baumannii</i> (1), <i>Enterobacter sp.</i> (1), <i>Aspergillus</i> + <i>Candida albicans</i> (1), <i>Enterobacter sp.</i> + <i>Candida albicans</i> (1), <i>Klebsiella pneumoniae</i> + <i>Enterobacter sp.</i> (1), <i>Psuedomonas aeruginosa</i> + <i>Candida albicans</i> (1), <i>Streptococcus</i> + <i>Neisseria sicca</i> (1), <i>Acinetobacter baumannii</i> + <i>Enterobacter sp.</i> + <i>Aspergillus</i> (1), <i>Klebsiella pneumoniae</i> (2), <i>Acinetobacter baumannii</i> + <i>Klebsiella pneumoniae</i> (1),                                                              |
| <b>Urinary</b>              | <b>1</b>  | <i>Psuedomonas aeruginosa</i> (1)                                                                                                                                                                                                                                                                                                                                                                                                                                                                                                                                                                                                                                         |

CNS: central nervous system; BALF: bronchoalveolar lavage fluid.

Supplementary Table 3. Associations of SLEDAI >10, peripheral lymphocyte count < 0.8X10<sup>9</sup>/L and serum creatinine >104 μmol/L with major infections in the first 4-month

| Predictors for major infection within first 4 months | Adjusted for glucocorticoids received within 1 month of enrollment* |         |
|------------------------------------------------------|---------------------------------------------------------------------|---------|
|                                                      | OR (95% CI)                                                         | P value |
| SLEDAI > 10                                          | 3.53 (1.50-8.28)                                                    | 0.004   |
| Lymphocyte count < 0.8X10 <sup>9</sup> /L            | 5.17 (2.41-11.04)                                                   | <0.0001 |
| Serum creatinine > 104 μmol/L                        | 8.15 (3.50-19.00)                                                   | <0.0001 |

SLEDAI: Systemic Lupus Erythematosus Disease Activity Index. \*Adjusted methylprednisolone pulses (≥500mg/d IV for 3 days) and cumulative prednisone equivalent dosages received within 1 month of enrollment.

Supplementary Figure 1. Cutoff values for SLEDAI and Age for predicting major infection within 4-month in patients with newly diagnosed SLE

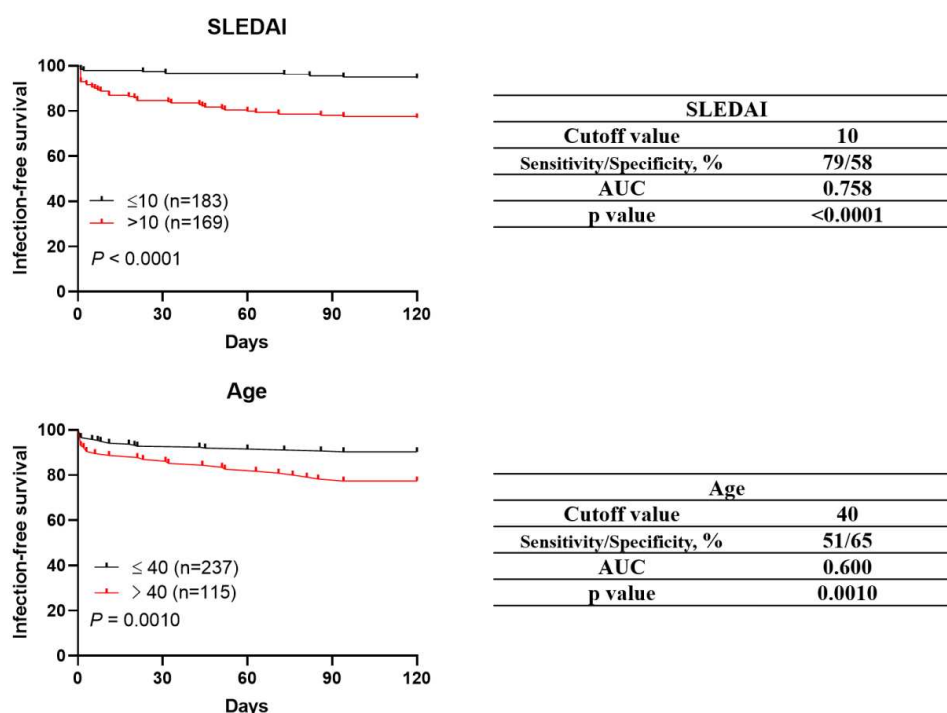

AUC = area under the curve. Cutoff values were determined by the multivariable receiver operating characteristic curve. P value was determined by Kaplan-Meier analysis with the Breslow test. Infection-free survival curves were compared between patient groups stratified by the cut-off value of SLEDAI score and Age on admission. SLEDAI: Systemic Lupus Erythematosus Disease Activity Index.
